# Supplementary material
Source: PubMed Central journal article supplement (PMC7482294)
Supplement: ao0c02665_si_001.pdf [file ao0c02665_si_001.pdf]

**Liquid-Liquid Extraction of Furfural from Water by Hydrophobic Deep  
Eutectic Solvents: Improvement of Density Function Theory Modeling with  
Experimental Validations**

Kyle McGaughy<sup>1</sup> and M. Toufiq Reza<sup>1\*</sup>

<sup>1</sup> Department of Biomedical and Chemical Engineering and Sciences, Florida Institute of Technology,  
150 W University Blvd, Melbourne, FL 32901

\* Corresponding Author: Email: [treza@fit.edu](mailto:treza@fit.edu), Tel: +1 321 674 8578

## Supplementary Information and Figures

Table S1. Conformers and Relative Energies for Ammonium Cations

| Species | Relative Energy (kcal/mol) | Conformer                                                                            |
|---------|----------------------------|--------------------------------------------------------------------------------------|
| N4444Br | 0                          | 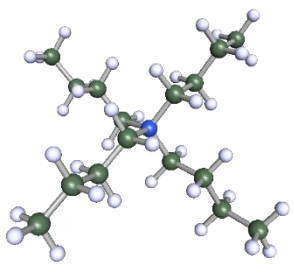   |
| N4444Br | 2.04                       |   |
| N4444Br | 2.06                       |  |

| Species | Relative Energy (kcal/mol) | Conformer                                                                            |
|---------|----------------------------|--------------------------------------------------------------------------------------|
| N5555Br | 0                          | 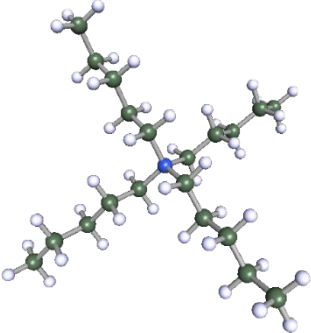   |
| N5555Br | 0.83                       |   |
| N5555Br | 0.89                       |  |
| N5555Br | 1.71                       |  |

|         |      |                                                                                                                             |
|---------|------|-----------------------------------------------------------------------------------------------------------------------------|
| N5555Br | 1.72 | 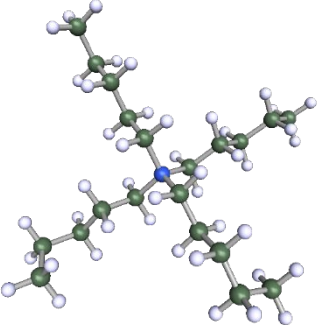<br><small>CCDC 1000000, 1.72 Å</small>   |
| N5555Br | 1.8  | <br><small>CCDC 1000000, 1.8 Å</small>    |
| N5555Br | 1.82 | <br><small>CCDC 1000000, 1.82 Å</small> |

| Species     | Relative Energy (kcal/mol) | Conformer                                                                                                                                                       |
|-------------|----------------------------|-----------------------------------------------------------------------------------------------------------------------------------------------------------------|
| N6666<br>Br | 0                          | 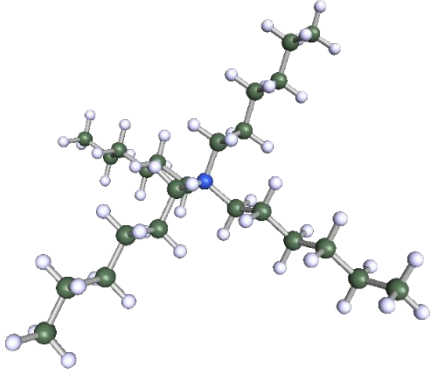 <p style="text-align: center; font-size: small;">P0007-001-001-001-001</p>   |
| N6666<br>Br | 0.78                       |  <p style="text-align: center; font-size: small;">P0007-001-001-001-001</p>  |
| N6666<br>Br | 0.84                       |  <p style="text-align: center; font-size: small;">P0007-001-001-001-001</p> |

|                     |             |                                                                                                                                                                |
|---------------------|-------------|----------------------------------------------------------------------------------------------------------------------------------------------------------------|
| <p>N6666<br/>Br</p> | <p>1.48</p> | 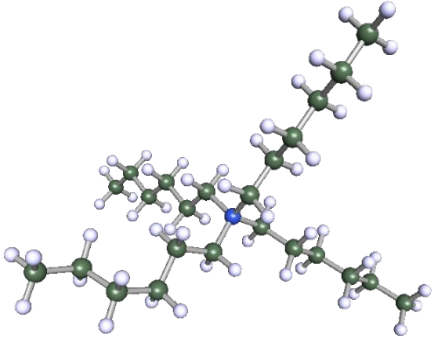 <p style="font-size: small; text-align: center;">2007 01 25 1.48 kbdm</p>   |
| <p>N6666<br/>Br</p> | <p>1.68</p> |  <p style="font-size: small; text-align: center;">2007 01 25 1.68 kbdm</p>  |
| <p>N6666<br/>Br</p> | <p>1.73</p> |  <p style="font-size: small; text-align: center;">2007 01 25 1.73 kbdm</p> |

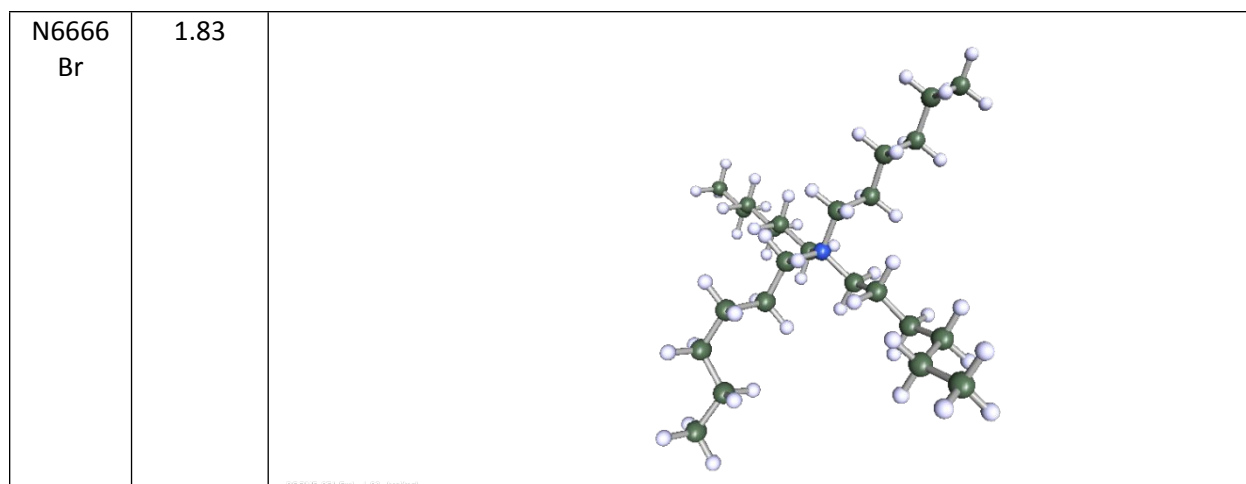

| Species | Relative Energy (kcal/mol) | Conformer                                                                                                                                                               |
|---------|----------------------------|-------------------------------------------------------------------------------------------------------------------------------------------------------------------------|
| N7777Br | 0                          | 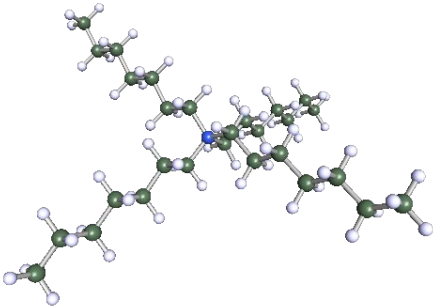 <p style="text-align: right; font-size: x-small;">BCONF_235 Brak 0 kcal/mol</p>     |
| N7777Br | 0.85                       |  <p style="text-align: right; font-size: x-small;">BCONF_258 Brak 0.85 kcal/mol</p> |

|         |      |                                                                                                                                                        |
|---------|------|--------------------------------------------------------------------------------------------------------------------------------------------------------|
| N7777Br | 1.69 | 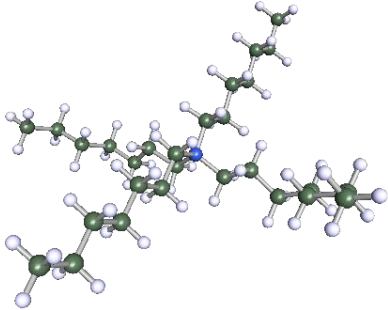 <p data-bbox="678 653 829 667">BCONF_751 Erel= 1.69 kcal/mol</p>    |
| N7777Br | 3.11 |  <p data-bbox="678 1129 829 1144">BCONF_705 Erel= 3.11 kcal/mol</p> |

| Species | Relative Energy (kcal/mol) | Conformer                                                                                                                                             |
|---------|----------------------------|-------------------------------------------------------------------------------------------------------------------------------------------------------|
| N8888Br | 0                          | 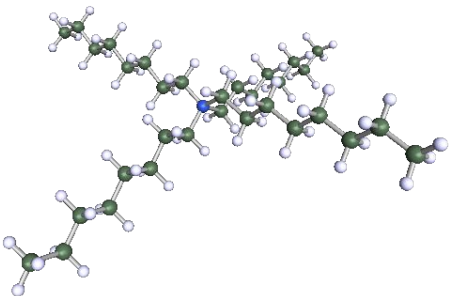 <p data-bbox="727 1707 873 1722">BCONF_1159 Erel= 0 kcal/mol</p> |



|         |      |                                                                                                                           |
|---------|------|---------------------------------------------------------------------------------------------------------------------------|
| N8888Br | 0.89 | 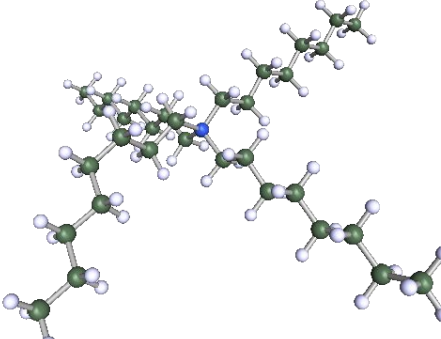 <p>8CONF_1203 Enr= 0.89 kcal/mol</p>   |
| N8888Br | 2.32 |  <p>8CONF_1163 Enr= 2.32 kcal/mol</p>  |
| N8888Br | 3.32 |  <p>8CONF_1198 Enr= 3.32 kcal/mol</p> |

|         |      |                                                                                                                        |
|---------|------|------------------------------------------------------------------------------------------------------------------------|
| N8888Br | 3.35 | 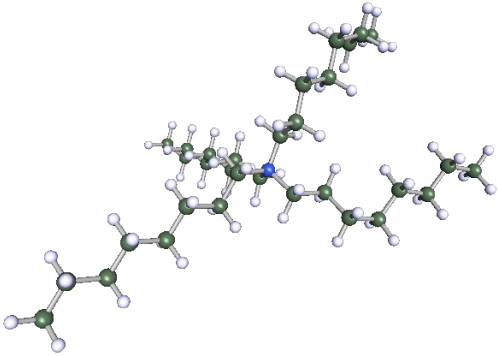 <p>8CONF_1408 Enk 3.35 kcal/mol</p> |
| N8888Br | 3.62 |  <p>8CONF_717 Enk 3.62 kcal/mol</p> |

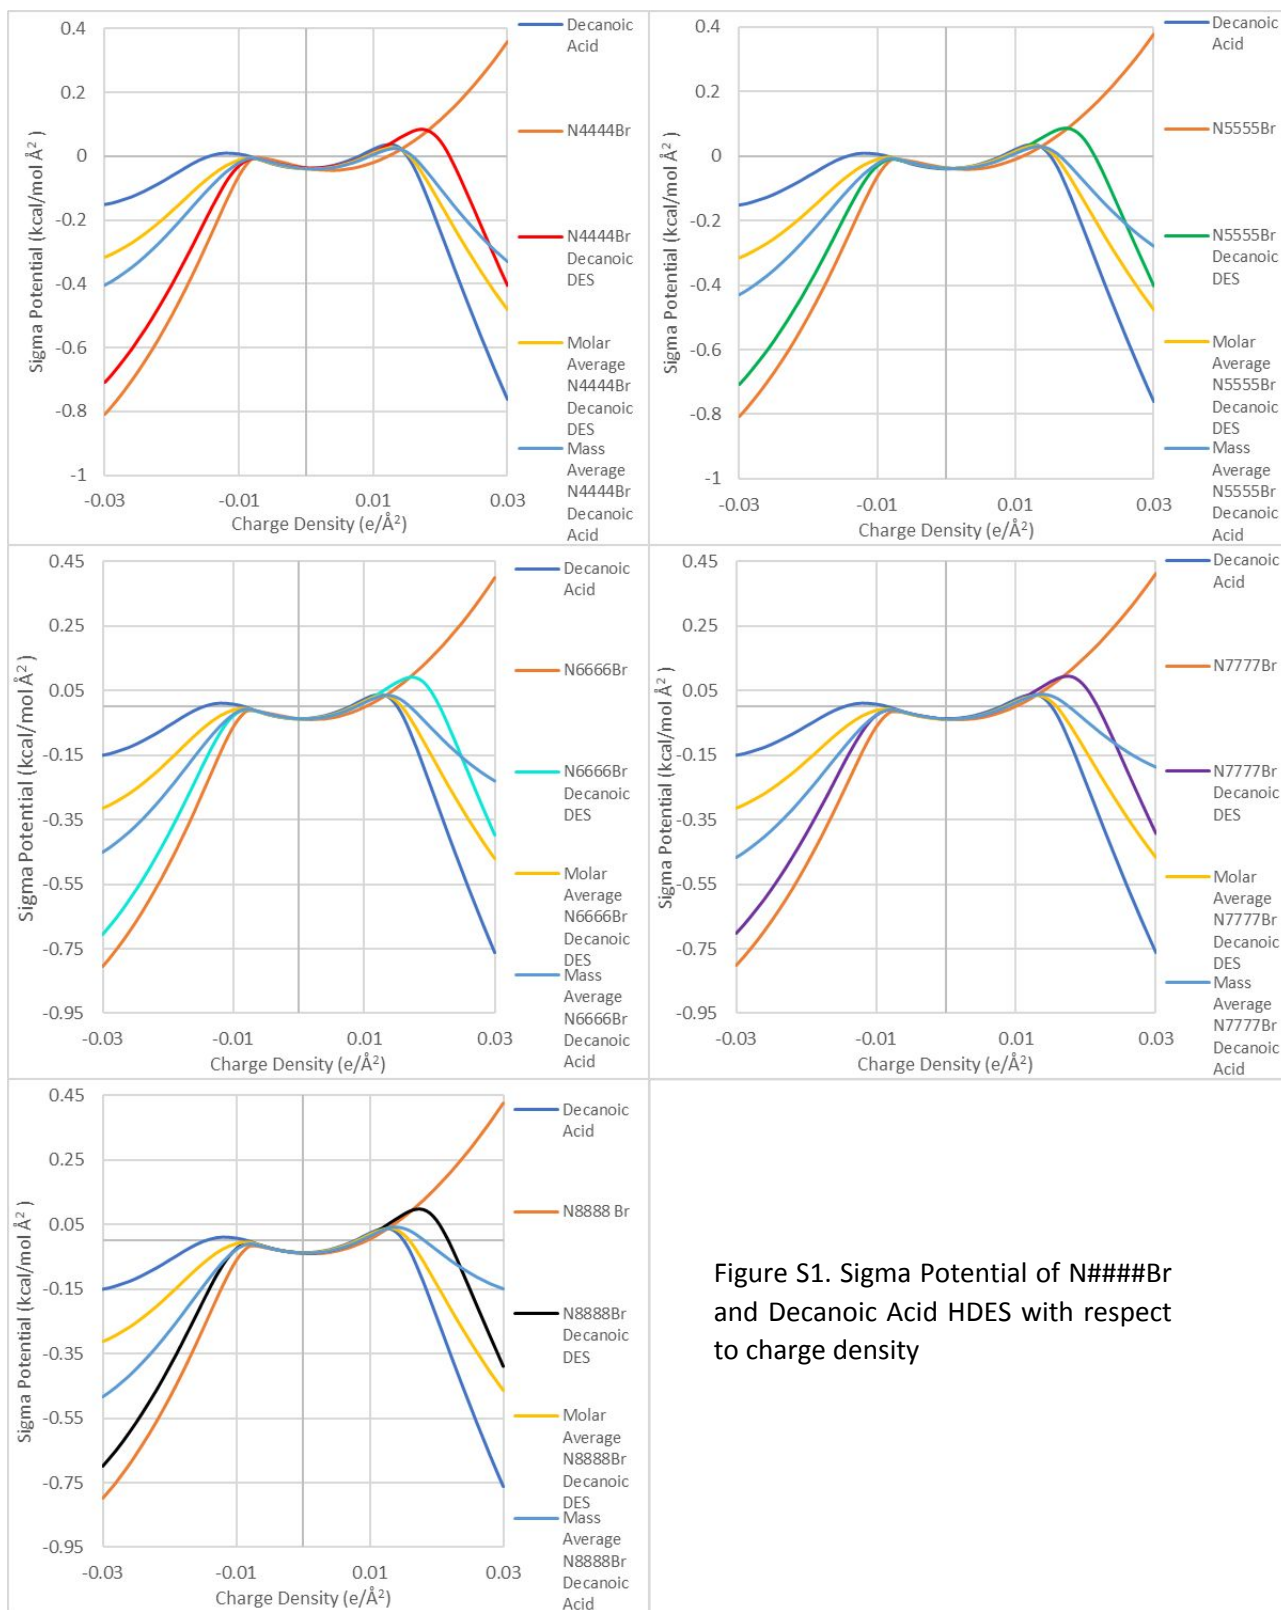

Figure S1. Sigma Potential of N####Br and Decanoic Acid HDES with respect to charge density

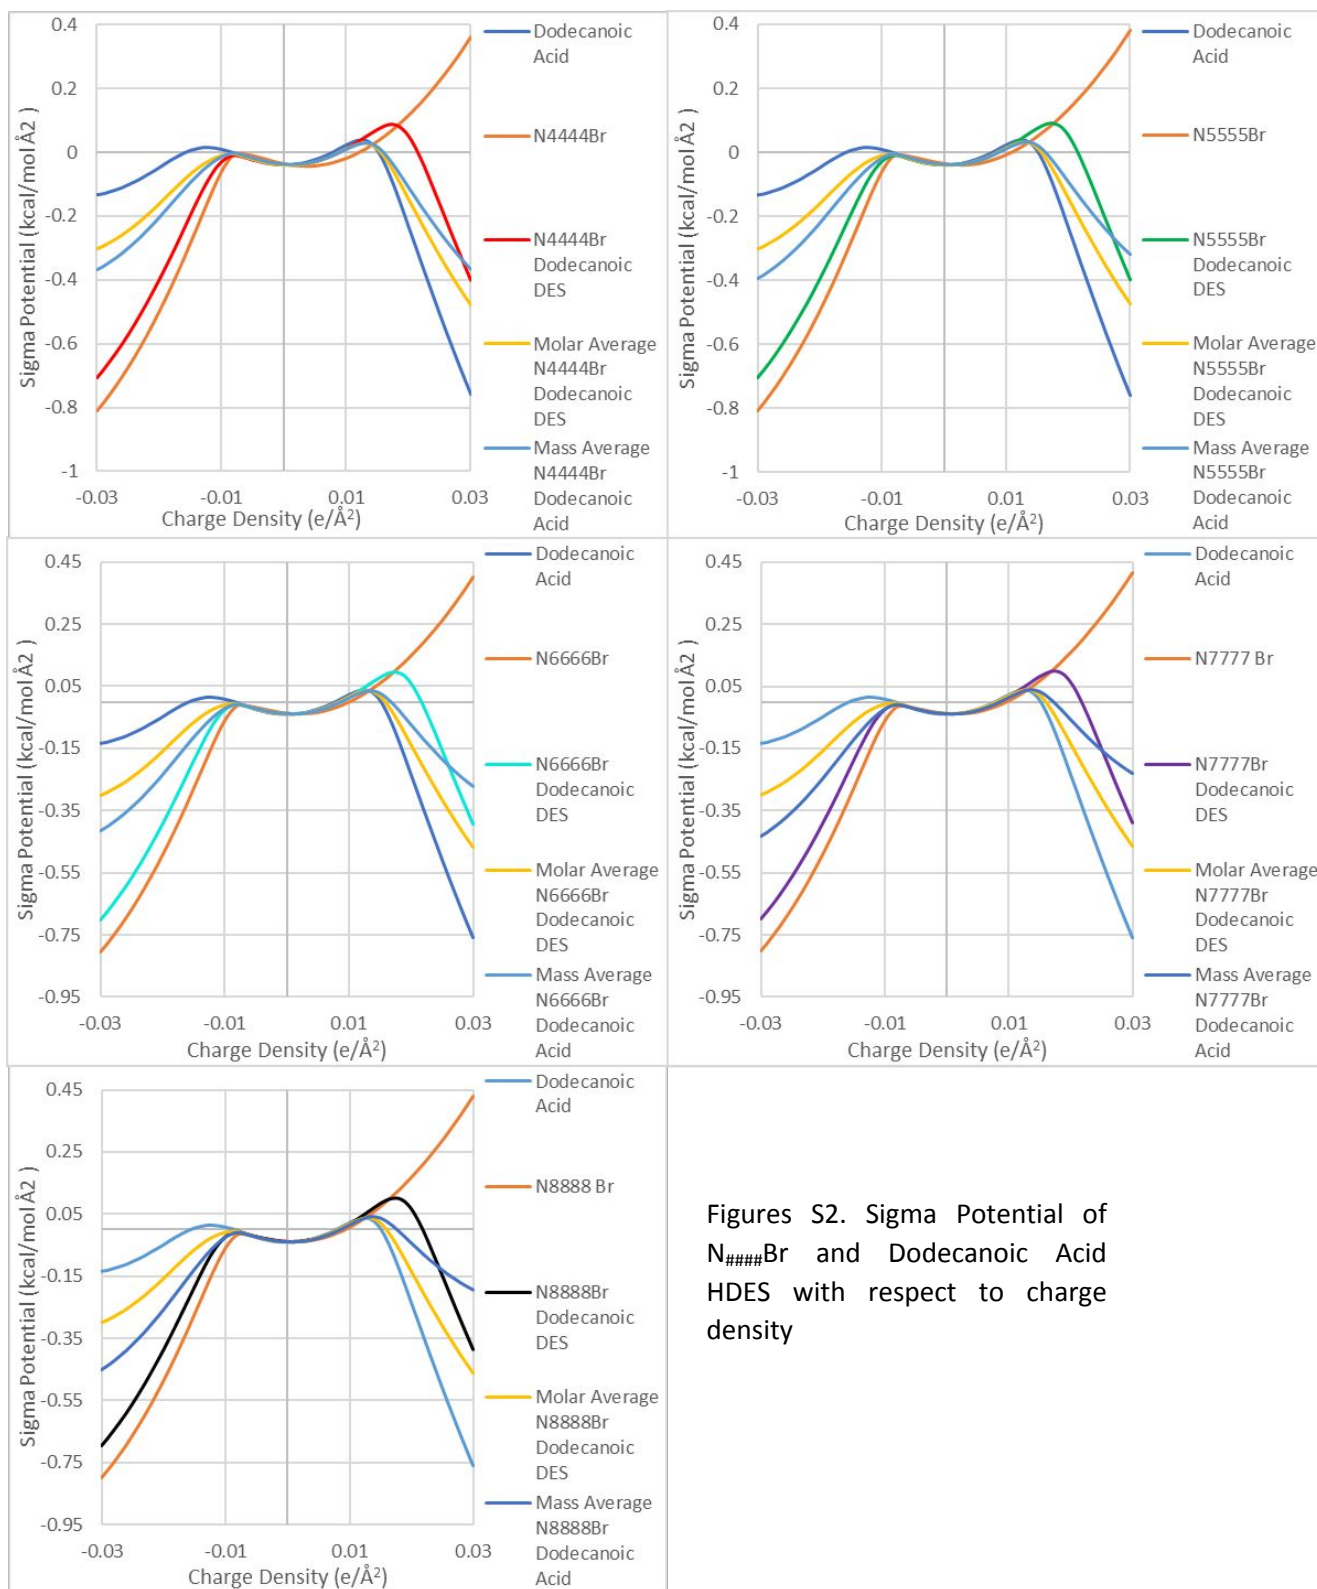

Figures S2. Sigma Potential of N####Br and Dodecanoic Acid HDES with respect to charge density
